# Supplementary material for: Surface treatment of ZnO:Sb microwires to improve their persistent photo-conductance response
Source: Royal Society of Chemistry journal article supplement (doi:10.1039/d4ra06909a), 2025-01-01
Supplement: d4ra06909a1.pdf [file d4ra06909a1.pdf]

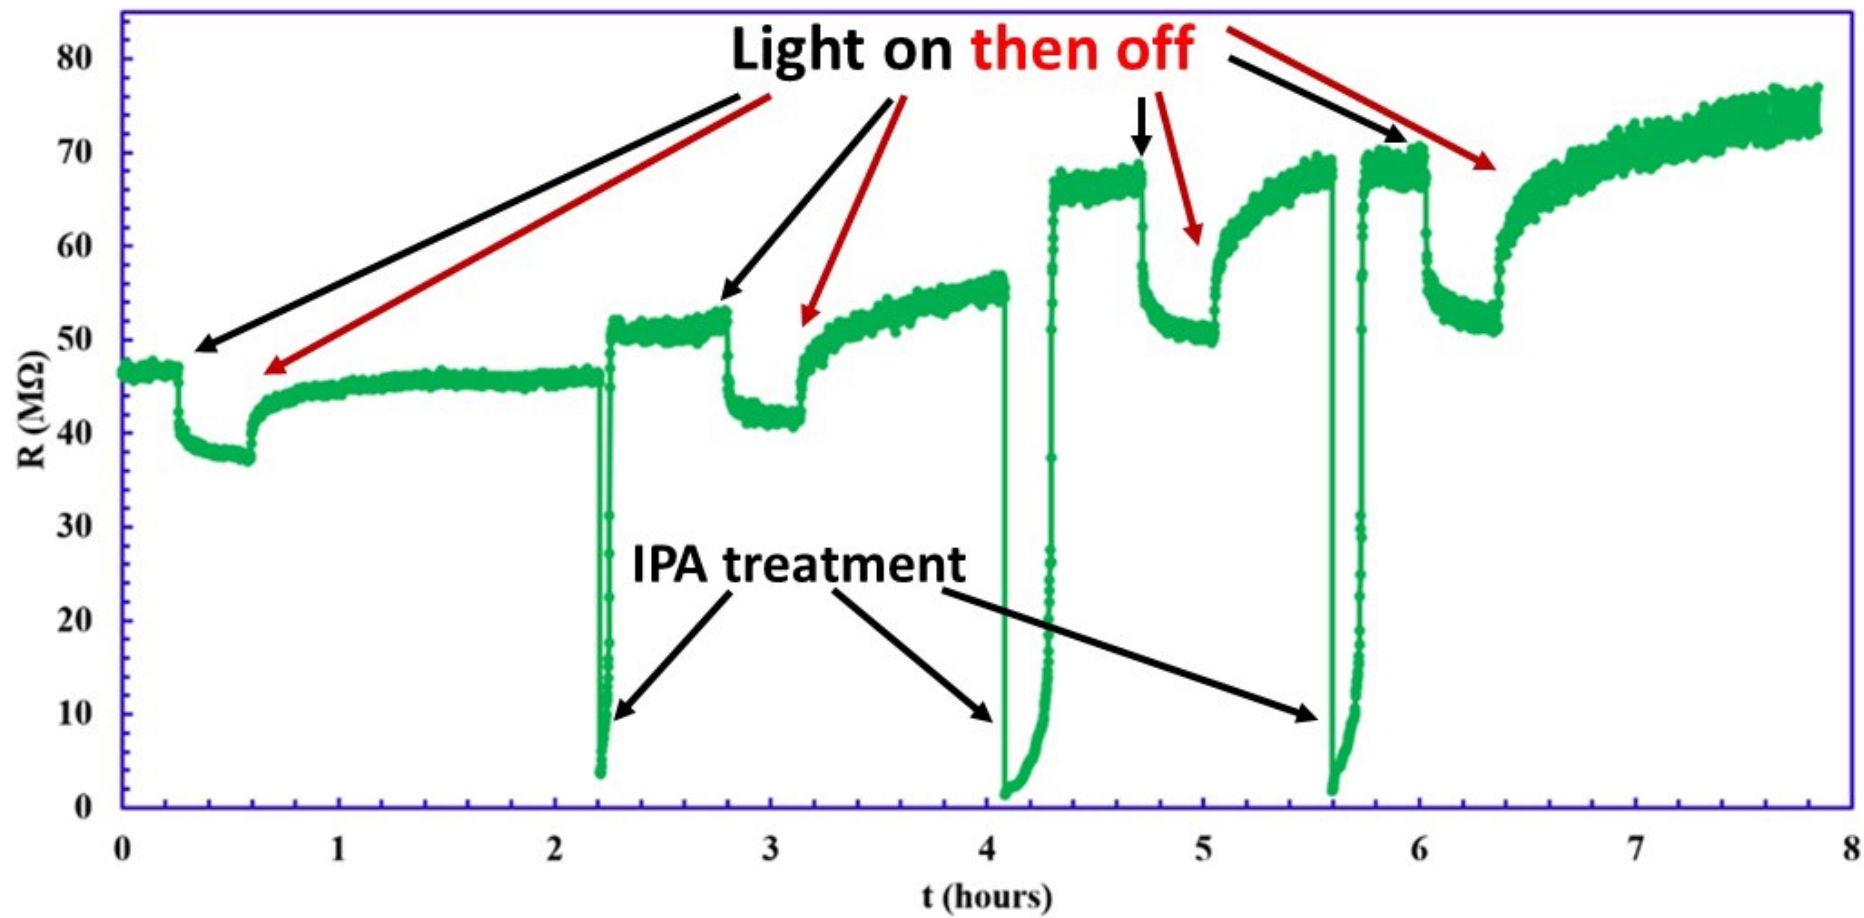

ZnO:Sb wire resistance versus time. IPA treatment causes the resistance to rise. Yet, turning the light on causes a larger drop in resistance compared to the untreated sample. So, the IPA treatment makes the sample surface more sensitive to light treatment.
