# Supplementary material for: Surface treatment of ZnO:Sb microwires to improve their persistent photo-conductance response
Source: Royal Society of Chemistry journal article supplement (doi:10.1039/d4ra06909a), 2025-01-01
Supplement: d4ra06909a2.pdf [file d4ra06909a2.pdf]

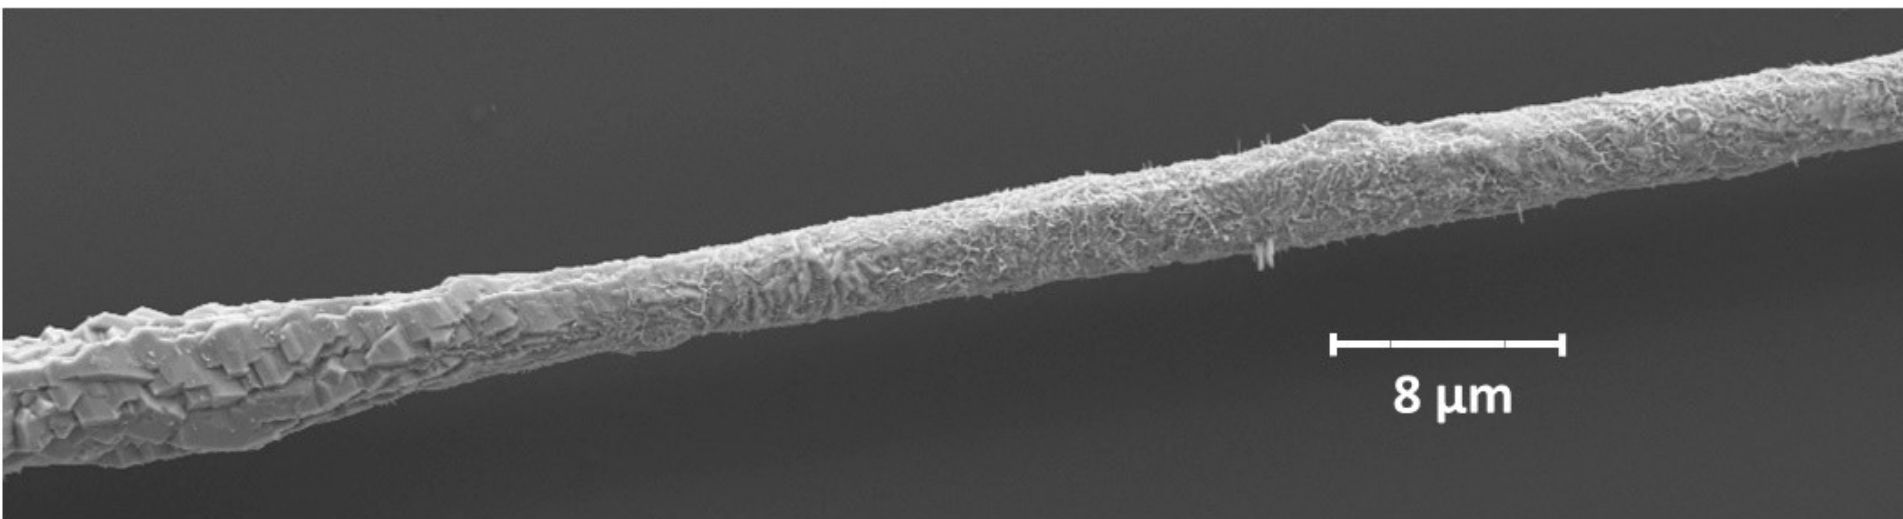

SEM image showing that the diameter of the ZnO:Sb microwires varies from one place to another and shows the wire to be polycrystalline with a rough surface.
